# Supplementary material for: Effect of Dietary Components on Larval Life History Characteristics in the Medfly (Ceratitis capitata: Diptera, Tephritidae)
Source: PubMed Central journal article supplement (PMC3897573; doi:10.1371/journal.pone.0086029), 2014-01-21
Supplement: pone.0086029.s001.pdf [file pone.0086029.s001.pdf]

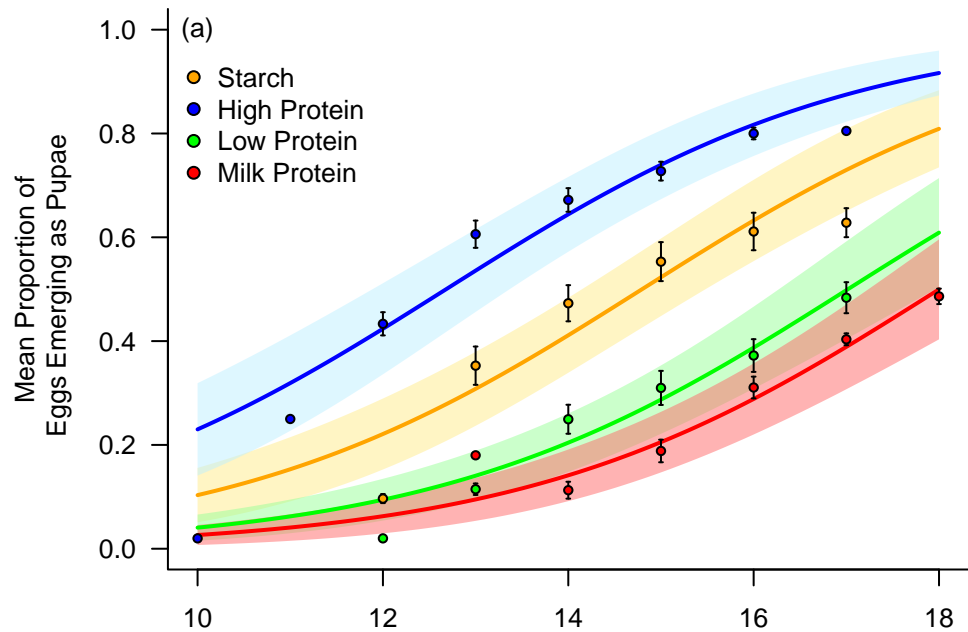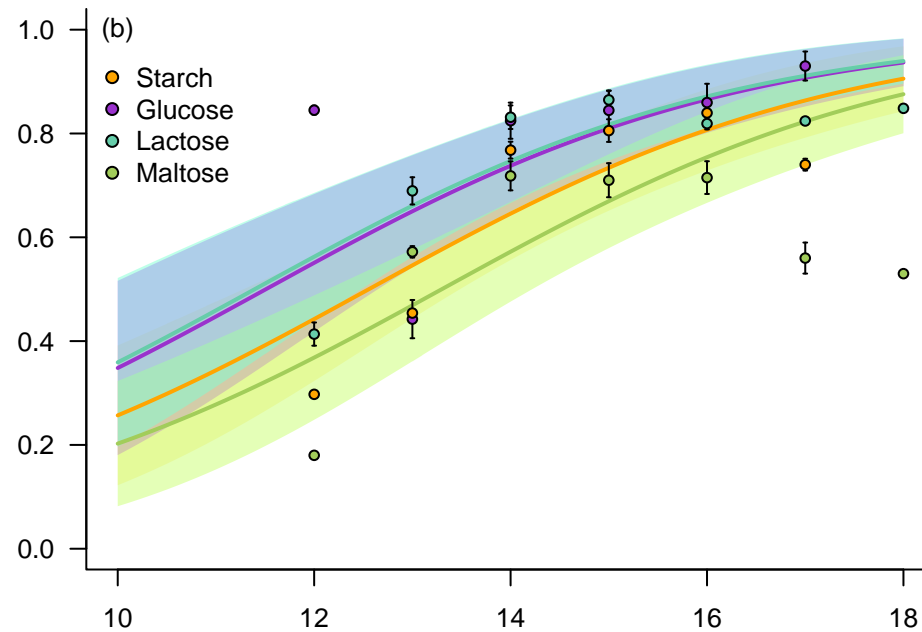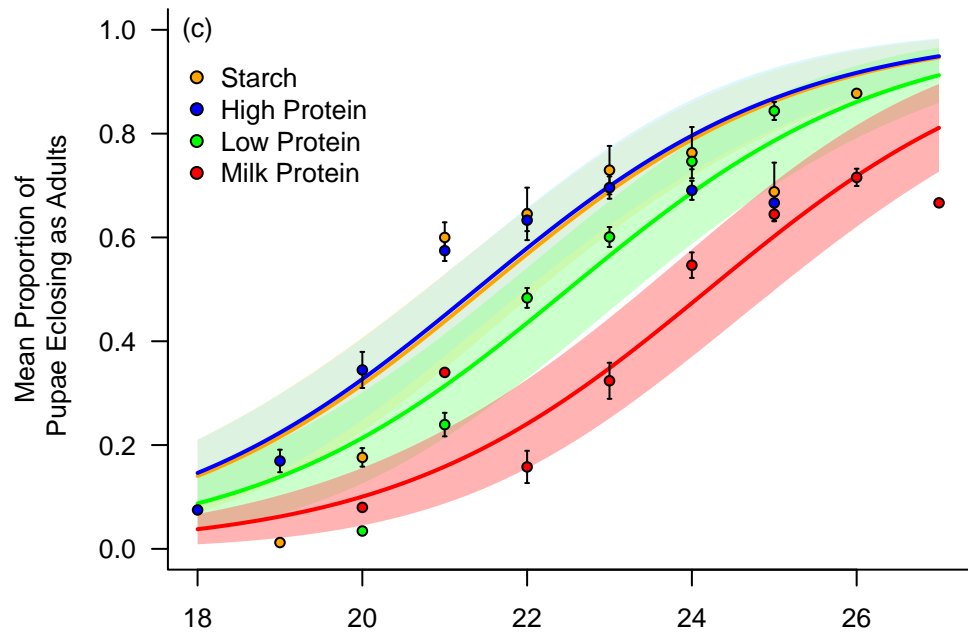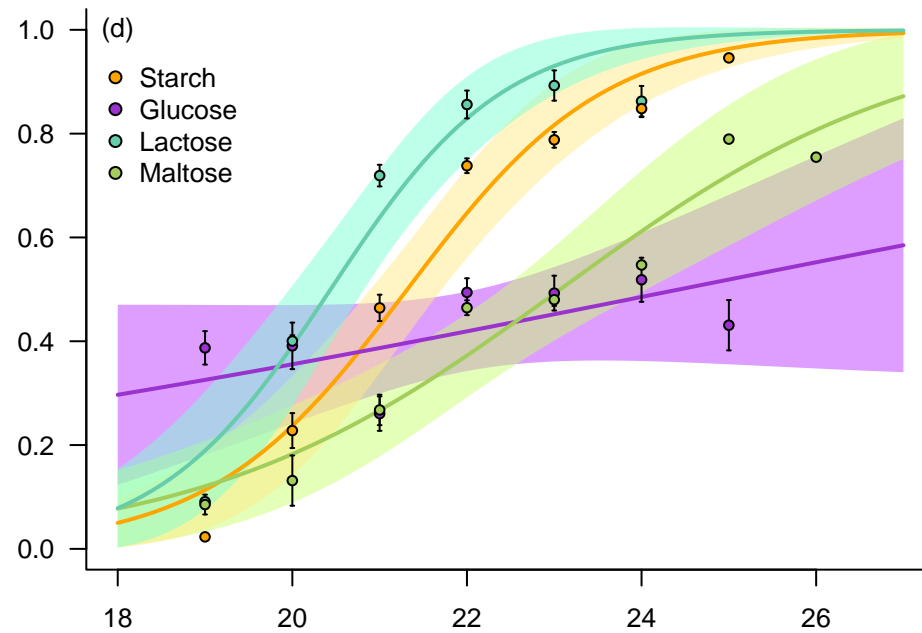

Experimental Day
